# Supplementary material
Source: ML conference proceedings conference paper supplement (https://openreview.net/forum?id=XXPzBhOs4f)
Supplement: supplementary_material [file attachment]

## 489 A Broader Impacts and Ethical Considerations of this Work

490 The specification of an adequate privacy level  $\varepsilon$  is challenging since it does not only depend on  
 491 the domain but also on the dataset itself. This challenge persists when assigning individual privacy  
 492 levels over a dataset. Especially in sensitive domains, one needs to make sure that the assignment  
 493 of individual privacy guarantees does not pose an additional risk to the individuals whose data is  
 494 processed. Therefore, one needs to first make sure that assigning individual privacy guarantees is not  
 495 abused. This can occur when the entity training the model violates underlying individuals' privacy  
 496 by nudging them into choosing inadequate privacy levels. Second, one needs to prevent individuals  
 497 from giving up their privacy due to a lack of understanding or a wrong perception of their risk. To  
 498 do so, IDP-SGD should not be used as a stand-alone method. Instead, following the example of  
 499 [5], we suggest incorporating it into a whole process that involves communicating the functioning  
 500 of DP and the risks associated with a decision to the individuals, analyzing their preferences, and  
 501 supporting them in an informed decision-making process. There exist a growing body of work on the  
 502 communication of DP methodology and associated risks to the public [32, 7, 10]. The most recent  
 503 finding [10] suggests that medical risk communication formats, such as percentages or frequencies,  
 504 are best applicable to inform about privacy risks. For the identification of privacy preferences, existing  
 505 frameworks, such as [30] can be applied. Finally, we suggest giving individuals the choice between  
 506 categorical privacy levels (*e.g.*, *high*, *medium*, *low*) while putting a regulatory entity, such as an ethics  
 507 committee in charge of specifying concrete numeric values of  $\varepsilon$ . This mitigates the disadvantages of  
 508 the general limited interpretability of  $\varepsilon$  that exist independently of individualization.

509 **Limitations.** In this work, we consider a setup where individuals indicate their privacy preferences.  
 510 We acknowledge that not all individuals are aware of their own privacy preferences and might,  
 511 therefore, provide inaccurate indications. Therefore, our framework should be always deployed  
 512 in a protected setup as described above. While we provide theoretical privacy guarantees in the  
 513 framework of differential privacy, we assess the practical impact of these guarantees on the individuals  
 514 solely through membership inference attacks. Future work should investigate the practical (disparate  
 515 per privacy-group) impact on other known privacy risks, such as data reconstruction. Due to the  
 516 lack of sensitive-real world datasets that, in addition to individuals' data, also capture their privacy  
 517 preferences, we evaluate our methods on standard benchmark datasets. We, therefore, have to *simulate*  
 518 a privacy preference distribution on this data according to the distribution known from society.

## 519 B Extended Background

### 520 B.1 Differential Privacy

521 Differential Privacy (DP) [8] provides a theoretical upper bound on the influence that a single data  
 522 point can have on the outcome of an analysis over the whole dataset.

523 The most commonly applied instantiation of DP is  $(\varepsilon, \delta)$ -DP which is defined as follows:

524 **Definition B.1.** Let  $D, D' \subseteq \mathcal{D}$  be two neighboring datasets, *i.e.*, datasets that differ in exactly one  
 525 data point. Let further  $M: \mathcal{D}^* \rightarrow \mathcal{R}$  be a mechanism that processes an arbitrary number of data  
 526 points.  $M$  satisfies  $(\varepsilon, \delta)$ -DP if for all datasets  $D \sim D'$ , and for all result events  $R \subseteq \mathcal{R}$

$$\mathbb{P}[M(D) \in R] \leq e^\varepsilon \cdot \mathbb{P}[M(D') \in R] + \delta. \quad (4)$$

527 In the definition, the privacy level is specified by  $\varepsilon \in \mathbb{R}_+$ , while  $\delta \in [0, 1]$  offers a relaxation, *i.e.*, a  
 528 small probability of violating the guarantees.

529 In Algorithm 3, we highlight the DP-SGD algorithm that allows to train ML models with DP  
 530 guarantees.

### 531 B.2 Differential Privacy Accounting in Machine Learning

532 Privacy accounting in DP-SGD is most commonly implemented by the moments accountant which  
 533 keeps track of a bound on the moments of the privacy loss random variable at outcome  $R$ , defined by

$$c(R; M, \mathbf{aux}, D, D') = \log \frac{\Pr[M(\mathbf{aux}, D) \in R]}{\Pr[M(\mathbf{aux}, D') \in R]}. \quad (5)$$

534 for  $D, D', M$  and  $R$  as above, and an auxiliary input  $\mathbf{aux}$ .

---

**Algorithm 3:** Differentially Private SGD [1]

---

**Require:** Training dataset  $\mathcal{D}$  with data points  $\{x_1, \dots, x_N\}$ , loss function  $l$ , learning rate  $\eta$ , noise multiplier  $\sigma$ , sampling rate  $q$ , clip norm  $c$ , number of training iterations  $I$ .

```
1: Initialize  $\theta_0$  randomly
2: for  $t \in [I]$  do
3:   Poisson Sampling: Sample mini-batch  $L_t$  with per-point probability  $q$  from  $\mathcal{D}$ .
4:   For each  $i \in L_t$ , compute  $g_t(x_i) \leftarrow \nabla_{\theta_t} l(\theta_t, x_i)$ 
5:   1. Gradient Clipping
6:    $\bar{g}_t(x_i) \leftarrow g_t(x_i) / \max(1, \frac{\|g_t(x_i)\|_2}{c})$ 
7:   2. Noise Addition
8:    $\tilde{g}_t \leftarrow \frac{1}{|L_t|} (\sum_i \bar{g}_t(x_i) + \mathcal{N}(0, (\sigma c)^2 \mathbf{I}))$ 
9:    $\theta_{t+1} \leftarrow \theta_t - \eta \tilde{g}_t$ 
10: end for
11: Output  $\theta_T$ , privacy cost  $(\epsilon, \delta)$  computed using a privacy accounting method.
```

---

### B.3 Formalizing Individualized Privacy

Individualized privacy guarantees with DP can be formalized as follows [15]:

**Definition B.2.** Let  $d \in \mathcal{D}$  be a data point.  $M$  satisfies  $(\epsilon_d, \delta_d)$ -DP if for all datasets  $D \stackrel{d}{\sim} D'$ , and for all result events  $R \subseteq \mathcal{R}$

$$\mathbb{P}[M(D) \in R] \leq e^{\epsilon_d} \cdot \mathbb{P}[M(D') \in R] + \delta_d. \quad (6)$$

Note that other notions of DP (e.g., RDP) can analogously be generalized to enable per-data point privacy guarantees.

### B.4 PATE Algorithm

The Private Aggregation of Teacher Ensembles (PATE) algorithm [26] represents an alternative to DP-SGD for training ML models with privacy guarantees. This ensemble-based algorithm implements privacy guarantees through a knowledge transfer from the ensemble to a separate student model. More concretely, in PATE, the private training data is split into non-overlapping subsets and distributed among several teacher models. Once each teacher is trained on their own data subset, they perform a privacy-preserving knowledge transfer by jointly labeling an additional unlabeled public dataset. To implement DP guarantees, noise is added to the labeling process. On completion, an independent student model is trained on the public dataset using the generated labels, and thereby incorporating knowledge about the original training data without ever requiring access to it.

**Individualized PATE.** The individualized PATE variants by [5] are *Upsample* and *Weight*. Upsample duplicates data points and distributes them to different teachers in the PATE ensemble. Utility increase in this method result from the availability of more training data points for the teachers. Since the sensitivity for a duplicated data point increases (it can change the votes of all the teachers that are trained on its duplicates), privacy consumption of that data point is higher. Since each data point can be duplicated individually, this method allows for a fine-grained individualization. In contrast, the weight method allows for a per-teacher model privacy individualization. Data points with the same privacy budget are assigned to the same teacher model(s) and the impact of that teacher model's weight on the final vote is weighted according to its training data points' privacy preferences. Teachers that are trained on data points with low privacy requirements are weighted higher, increasing the privacy consumption of their training data.

### B.5 The Lira Membership Inference Attack

The Lira membership inference attack [6] proceeds in three steps to determine which data points from a dataset  $\mathcal{D} = \{x_1, \dots, x_N\}$  were used to train a target model  $f$ : (1) First, multiple shadow models, similar to  $f$ , are trained on different subsets of  $\mathcal{D}$ . (2) Then, the mean and variance of two loss distributions  $\mathcal{N}(\mu_{\text{in}}, \sigma_{\text{in}})$  and  $\mathcal{N}(\mu_{\text{out}}, \sigma_{\text{out}})$  are estimated per data point  $x_i$ . Both distributions

are calculated from the logits of  $x_i$  at the target class  $y_i$ —the former one over the shadow models that  $x_i$  is a member of, the latter one on shadow models that  $x_i$  is not a member of. (3) Finally, the likelihood of a new data point  $x$  of class  $y$  being a member of the target model  $f$  is calculated as

$$\Lambda = \frac{p(f(x)_y \mid \mathcal{N}(\mu_{\text{in}}, \sigma_{\text{in}}^2))}{p(f(x)_y \mid \mathcal{N}(\mu_{\text{out}}, \sigma_{\text{out}}^2))}.$$

## C Details on the Methods

### C.1 Sample

**Leveraging Higher Sampling Rates for Increased Utility.** With higher sampling rates for certain data points, utility could, in principle be increased in several ways. (1) Larger sampling rates can be used to obtain higher mini-batch sizes  $B$  (while keeping the number of training iterations  $I$  constant). Line 3 in Algorithm 3 shows that noise is added to the aggregate of all gradients. Hence, with larger mini-batches, the signal-to-noise ratio is higher, which can improve training. (2) Alternatively, the mini-batch size  $B$  can be kept constant while increasing the number of training iterations  $I$ . Longer training can increase model performance. However, these two approaches result in a change of core training hyperparameters (mini-batch size and number of iterations). As we discuss in Section 3, changing training hyperparameters would require a separate fine-tuning, for example, to adapt the learning rate for larger mini-batches, as in (1) or longer training as in (2). Since the training parameters would change according to the privacy budgets encountered in the private training dataset, and the ratios of these budgets over the training data points, the hyperparameter-tuning would have to be repeated whenever the dataset is updated, individuals change their privacy preferences, or decide to withdraw their consent for leveraging their data for the ML model altogether, yielding significant overheads. We, therefore, implement our **Sample** according to the third option (3), described in Section 3.3 which leverages higher sampling rates for improved utility by reducing the noise multiplier of the added noise  $\sigma$ . This allows us to perform an apple to apple comparison between both our methods and to the standard DP-SGD.

### C.2 Scale

**Deriving Noise Multiplier  $\sigma_{\text{scale}}$ .** Given the desired clip norm  $c$  found through hyperparameter tuning of the standard DP-SGD, we set the individual clip norms such that their weighted average yields  $c$  as  $c = \frac{1}{N} \sum_{p=1}^P |G_p| \cdot c_p$ . So, we derive the  $\sigma_{\text{scale}}$  in the following way:

$$c = \frac{1}{N} \sum_{p=1}^P |G_p| \cdot c_p \quad (7)$$

$$c = \frac{1}{N} \sum_{p=1}^P |G_p| \cdot \left( c \frac{\sigma_{\text{scale}}}{\sigma_p} \right) \quad (8)$$

$$c = c \sigma_{\text{scale}} \frac{1}{N} \sum_{p=1}^P \frac{|G_p|}{\sigma_p} \quad (9)$$

$$\sigma_{\text{scale}} = \left( \frac{1}{N} \sum_{p=1}^P \frac{|G_p|}{\sigma_p} \right)^{-1} \quad (10)$$

From (7) to (8), we use the equality between the scale of added noise  $\sigma_{\text{scale}} c = \sigma_p c_p$ . In (9), we extract terms that are independent of the privacy groups ( $c$  and  $\sigma_{\text{scale}}$ ) before the summation.

### C.3 Algorithmic Details

We specify our used sub-routines used for determining a sample rate or noise multiplier based on given privacy parameters in Algorithm 4 and Algorithm 5, respectively.

---

**Algorithm 4: Subroutine getSampleRate.** Is the equivalent to Opacus’ function `get_noise_multiplier` [25] for deriving an adequate sample rate for given parameters.

---

**Require:** Target  $\varepsilon$ , target  $\delta$ , iterations  $I$ , noise multiplier  $\sigma$ , precision  $\gamma = 0.01$

```

1: init  $\varepsilon_{\text{high}}$ :  $\varepsilon_{\text{high}} \leftarrow \infty$ 
2: init  $q_{\text{low}}, q_{\text{high}}$ :  $q_{\text{low}} \leftarrow 1\text{e-}9, q_{\text{high}} \leftarrow 0.1$ 
3: while  $\varepsilon_{\text{high}} > \varepsilon$  do
4:    $q_{\text{high}} \leftarrow 2q_{\text{high}}$ 
5:    $\varepsilon_{\text{high}} \leftarrow I \cdot 2q_{\text{high}}^2 \frac{1}{\sigma^2}$  {approximate epsilon according to Equation (2), we suppress  $\alpha$  for simplicity}
6: end while
7: while  $\varepsilon - \varepsilon_{\text{high}} > \gamma$  do
8:    $q \leftarrow (q_{\text{low}} + q_{\text{high}})/2$ 
9:    $\varepsilon_{\text{temp}} \leftarrow I \cdot 2q^2 \frac{1}{\sigma^2}$  {approximate epsilon according to Equation (2), we suppress  $\alpha$  for simplicity}
10:  if  $\varepsilon_{\text{temp}} < \varepsilon$  then
11:     $q_{\text{high}} \leftarrow q$ 
12:     $\varepsilon_{\text{high}} \leftarrow \varepsilon_{\text{temp}}$ 
13:  else
14:     $q_{\text{low}} \leftarrow q$ 
15:  end if
16: end while
17: Output  $q_{\text{high}}$ 

```

---



---

**Algorithm 5: Subroutine getNoise.** Implements Opacus’ function `get_noise_multiplier` [25].

---

**Require:** Target  $\varepsilon$ , target  $\delta$ , iterations  $I$ , sample rate  $q$ , precision  $\gamma = 0.01$

```

1: init  $\varepsilon_{\text{high}}$ :  $\varepsilon_{\text{high}} \leftarrow \infty$ 
2: init  $\sigma_{\text{low}}, \sigma_{\text{high}}$ :  $\sigma_{\text{low}} \leftarrow 0, \sigma_{\text{high}} \leftarrow 10$ 
3: while  $\varepsilon_{\text{high}} > \varepsilon$  do
4:    $\sigma_{\text{high}} \leftarrow 2\sigma_{\text{high}}$ 
5:    $\varepsilon_{\text{high}} \leftarrow I \cdot 2q^2 \frac{1}{\sigma_{\text{high}}^2}$  {approximate epsilon according to Equation (2), we suppress  $\alpha$  for simplicity}
6: end while
7: while  $\varepsilon - \varepsilon_{\text{high}} > \gamma$  do
8:    $\sigma \leftarrow (\sigma_{\text{low}} + \sigma_{\text{high}})/2$ 
9:    $\varepsilon_{\text{temp}} \leftarrow I \cdot 2q^2 \frac{1}{\sigma^2}$  {approximate epsilon according to Equation (2), we suppress  $\alpha$  for simplicity}
10:  if  $\varepsilon_{\text{temp}} < \varepsilon$  then
11:     $\sigma_{\text{high}} \leftarrow \sigma$ 
12:     $\varepsilon_{\text{high}} \leftarrow \varepsilon_{\text{temp}}$ 
13:  else
14:     $\sigma_{\text{low}} \leftarrow \sigma$ 
15:  end if
16: end while
17: Output  $\sigma_{\text{high}}$ 

```

---

## 600 D Additional Empirical Evaluation

601 We report the hyperparameters found for our individualized methods in Table 5. The training and  
602 standard DP-SGD hyperparameters are specified in Table 4. The performance of our individualized  
603 methods when using the hyperparameters of standard DP-SGD is presented in Table 7. Already when  
604 using these (non-individually tuned) hyperparameters, our methods yield a significant performance  
605 increase in comparison to standard DP-SGD. For MNIST, individual hyperparameter for our methods  
606 and individual setups did not yield significant improvements, therefore the results presented in Table 7  
607 and Table 2 are identical for MNIST.

608 **Computing Resources.** The implementation of our methods does not increase computation time  
609 over the standard implementation of DP-SGD apart from the derivation of the privacy parameters that  
610 is performed once at the beginning of training. Hence, to run all experiments around our methods and  
611 their evaluation, we required, in total less than 16h of GPU time on a standard GeForce RTX 2080  
612 Ti. We ran the experiment on combining individualized privacy assignment and accounting on the  
613 same machines RTX 2080Ti and the total compute time is also around 2h. To train all the shadow  
614 models for our membership inference attack and run inference on them, we ran on an A100 GPU and  
615 required a total runtime of roughly 32 hours.

Table 4: **DP-SGD Hyperparameters.** LR: learning rate, B: expected mini-batch size, I: number of iterations, C: clip norm,  $\sigma$ : noise multiplier in DP-SGD derived from the desired privacy budget  $\varepsilon = 1$ . Default target  $\delta = 0.00001$ .

| DATASET | LR  | B    | I              | C   | $\sigma$ |
|---------|-----|------|----------------|-----|----------|
| MNIST   | 0.6 | 512  | 9375~80 EPOCHS | 0.2 | 3.42529  |
| SVHN    | 0.2 | 1024 | 2146~30 EPOCHS | 0.9 | 2.74658  |
| CIFAR10 | 0.7 | 1024 | 1465~30 EPOCHS | 0.4 | 3.29346  |

Table 5: **DP-SGD Hyperparameters (Individually Tuned).** LR: learning rate, B: expected mini-batch size, I: number of iterations, C: clip norm,  $\sigma$ . Default target  $\delta = 0.00001$ . Setup A is for privacy budgets  $\varepsilon = \{1.0, 2.0, 3.0\}$  and their respective distribution of 34%-43%-23%. Setup B is for the same privacy budgets but with their distributions 54%-37%-9%.

| DATASET | METHOD | SETUP | LR  | B    | I              | C   | $\sigma$ |
|---------|--------|-------|-----|------|----------------|-----|----------|
| MNIST   | SAMPLE | A     | 0.6 | 512  | 9375~80 EPOCHS | 0.2 | 3.42529  |
| SVHN    | SAMPLE | A     | 0.2 | 1024 | 5723~80 EPOCHS | 0.6 | 2.53261  |
| CIFAR10 | SAMPLE | A     | 0.2 | 1024 | 2929~60 EPOCHS | 1.0 | 2.65712  |
| MNIST   | SAMPLE | B     | 0.6 | 512  | 9375~80 EPOCHS | 0.2 | 3.42529  |
| SVHN    | SAMPLE | B     | 0.1 | 1024 | 3577~50 EPOCHS | 0.6 | 2.41421  |
| CIFAR10 | SAMPLE | B     | 0.1 | 1024 | 2929~60 EPOCHS | 1.8 | 3.14049  |
| MNIST   | SCALE  | A     | 0.6 | 512  | 9375~80 EPOCHS | 0.2 | 3.42529  |
| SVHN    | SCALE  | A     | 0.1 | 1024 | 3577~50 EPOCHS | 2.0 | 2.09719  |
| CIFAR10 | SCALE  | A     | 0.2 | 1024 | 3418~70 EPOCHS | 1.1 | 2.88335  |
| MNIST   | SCALE  | B     | 0.6 | 512  | 9375~80 EPOCHS | 0.2 | 3.42529  |
| SVHN    | SCALE  | B     | 0.1 | 1024 | 3577~50 EPOCHS | 1.6 | 2.45703  |
| CIFAR10 | SCALE  | B     | 0.1 | 1024 | 2929~60 EPOCHS | 1.8 | 3.17792  |

We present the individualized privacy parameters identified for our methods in Table 6.

Table 6: **Individualization Parameters Computed by our Methods for Table 7.** We report the individualized privacy parameters identified for our Scale and Sample by Algorithm 2 and Algorithm 1, respectively. The parameters are obtained on the MNIST, SVHN, and CIFAR10 datasets when using the privacy budget distributions of Table 7 with  $\varepsilon = \{1.0 - 2.0 - 3.0\}$

| DATASET | SETUP       | DP-SGD   |     |       | SCALE            |                                 |                       | SAMPLE            |                       |
|---------|-------------|----------|-----|-------|------------------|---------------------------------|-----------------------|-------------------|-----------------------|
|         |             | $\sigma$ | $c$ | $q$   | $\sigma_{SCALE}$ | $\{\sigma_1, \dots, \sigma_P\}$ | $\{c_1, \dots, c_P\}$ | $\sigma_{SAMPLE}$ | $\{q_1, \dots, q_P\}$ |
| MNIST   | 34%-43%-23% | 3.425    | 0.2 | 0.008 | 2.063            | {2.189, 1.310, 1.032}           | {0.129, 0.216, 0.274} | 2.024             | {0.005, 0.009, 0.013} |
|         | 54%-37%-9%  | 3.425    | 0.2 | 0.008 | 2.418            | {2.189, 1.310, 1.032}           | {0.148, 0.248, 0.315} | 2.376             | {0.006, 0.011, 0.016} |
| SVHN    | 34%-43%-23% | 2.747    | 0.9 | 0.014 | 1.896            | {2.747, 1.589, 1.214}           | {0.561, 0.970, 1.270} | 1.667             | {0.008, 0.015, 0.021} |
|         | 54%-37%-9%  | 2.747    | 0.9 | 0.014 | 2.180            | {2.747, 1.589, 1.214}           | {0.651, 1.125, 1.472} | 1.937             | {0.009, 0.018, 0.025} |
| CIFAR10 | 34%-43%-23% | 3.293    | 0.4 | 0.020 | 2.244            | {3.294, 1.868, 1.399}           | {0.244, 0.430, 0.574} | 1.965             | {0.012, 0.022, 0.031} |
|         | 54%-37%-9%  | 3.293    | 0.4 | 0.020 | 2.594            | {3.294, 1.868, 1.399}           | {0.285, 0.502, 0.671} | 2.300             | {0.014, 0.026, 0.037} |

616

## 617 D.1 Privacy Consumption of our Methods

618 We track privacy consumption of our methods over the course of training in Figure 4. The figure  
619 highlights the good calibration of our methods which causes all privacy groups to exhaust their budget  
620 after the pre-specified number of training iterations.

Table 7: **Model Test Accuracy after training with Standard DP-SGD vs our Individualized DP-SGD** using Sample or Scale. **D** is the distribution of privacy groups (percentages) and  $\epsilon$  the privacy budget for a given group. The percentages of the three privacy groups are chosen according to Alaggan et al. [2] (first setup) and [23] (second setup). We used the hyperparameters found for standard DP-SGD, see Table 4 and report the standard deviation over 10 trials.

| DATASET |            | SETUP       | DP-SGD     | SAMPLE              | SCALE               |
|---------|------------|-------------|------------|---------------------|---------------------|
| MNIST   | <b>D</b>   | 34%-43%-23% | 96.75      | <b>97.81</b>        | 97.78               |
|         | $\epsilon$ | 1.0-2.0-3.0 | $\pm 0.15$ | $\pm \mathbf{0.09}$ | $\pm 0.08$          |
|         | <b>D</b>   | 54%-37%-9%  | 96.75      | <b>97.6</b>         | 97.54               |
|         | $\epsilon$ | 1.0-2.0-3.0 | $\pm 0.15$ | $\pm \mathbf{0.11}$ | 0.09                |
| SVHN    | <b>D</b>   | 34%-43%-23% | 83.26      | <b>84.56</b>        | 84.48               |
|         | $\epsilon$ | 1.0-2.0-3.0 | $\pm 0.31$ | $\pm \mathbf{0.25}$ | $\pm 0.25$          |
|         | <b>D</b>   | 54%-37%-9%  | 83.26      | <b>84.32</b>        | 84.31               |
|         | $\epsilon$ | 1.0-2.0-3.0 | $\pm 0.31$ | $\pm \mathbf{0.31}$ | $\pm 0.26$          |
| CIFAR10 | <b>D</b>   | 34%-43%-23% | 52.77      | 54.89               | <b>54.92</b>        |
|         | $\epsilon$ | 1.0-2.0-3.0 | $\pm 0.65$ | $\pm 0.55$          | $\pm \mathbf{0.63}$ |
|         | <b>D</b>   | 54%-37%-9%  | 52.77      | 54.88               | <b>55.00</b>        |
|         | $\epsilon$ | 1.0-2.0-3.0 | $\pm 0.65$ | $\pm 0.45$          | $\pm \mathbf{0.65}$ |

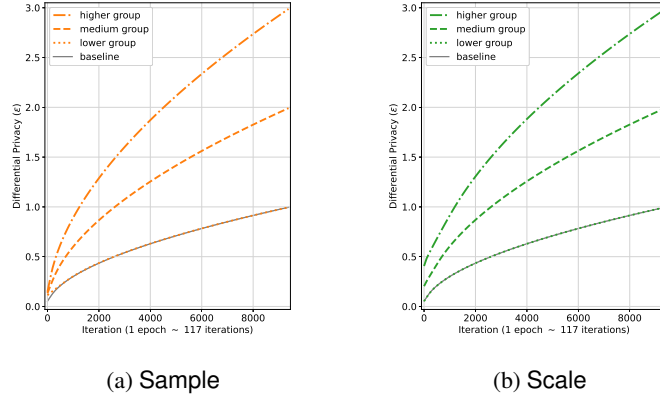

Figure 4: **Individual Privacy Costs on MNIST** for  $\epsilon \in \{1, 2, 3\}$  with Distribution (54%, 37%, 9%).

## 621 D.2 General Applicability of our Methods

622 We showcase the practical impact of individual privacy assignments on individual utility and demon-  
623 strate how our methods extend to many privacy groups and privacy budget distributions.

624 **Practical Impact.** We run experiments on the CIFAR10 dataset where we assign higher or lower  
625 privacy budgets to one of the 10 classes. We select all data points from the class 0 as the first privacy  
626 group and assign to it either higher ( $\epsilon = 3$ ), the same ( $\epsilon = 2$ ), or lower ( $\epsilon = 1$ ) privacy budgets in  
627 comparison to all other data points from the other classes ( $\epsilon = 2$ ). Table 8 shows that the choice of  
628 privacy budget for a single group also impacts the other groups. We observe that by only changing  
629 the privacy budget for the selected group (in this case for class 0), we can flip its performance  
630 (its accuracy from being higher to being lower) in comparison to the accuracy of the other group  
631 (consisting of remaining classes). In the example of class 0, the accuracy is 67.76% when assigned  
632 high privacy budget ( $\epsilon = 3$ ), which is a higher accuracy than for all other classes that have an average  
633 accuracy of around 53.41% and assigned the privacy budget  $\epsilon = 2$ . Then, by modifying only the  
634 privacy budget of class 0 and by assigning to it the low privacy budget ( $\epsilon = 1$ ), its accuracy drops  
635 to a mere 25.76% and is below the accuracy of 56.58% for the remaining classes. We visualize the  
636 impact of the chosen privacy budget on utility over all classes (instead of only the class 0) in Figure 5  
637 and Figure 6 for CIFAR10 and MNIST, respectively.

638 **More Privacy Groups.** We present in Table 9 the test accuracy for ten privacy groups, correspond-  
639 ing to the ten classes of the CIFAR10 dataset when each of the privacy groups obtains a different  
640 privacy budget. We obtained these budgets by manually tuning them such that the accuracy gap be-

641 tween the privacy groups is minimized. We also visualize the accuracy over training in Figure 7. The  
642 figure visualizes that our methods are able to make all privacy groups converge to similar accuracies.

Table 8: **Accuracy for Subgroups.** We assess the accuracy of subgroups when their privacy budgets differ. We select a single class for a given group and assign either higher, the same, or lower privacy budgets in comparison to groups with other classes. We change the privacy budgets only for bolded classes in a given experiment while all other classes have the same privacy budget ( $\varepsilon = 2$ ).

| Classes  | Privacy Budget                     |                            |                                    |
|----------|------------------------------------|----------------------------|------------------------------------|
|          | Higher ( $\varepsilon = 3$ )       | Same ( $\varepsilon = 2$ ) | Lower ( $\varepsilon = 1$ )        |
| <b>0</b> | <b><math>67.76 \pm 2.14</math></b> | $55.24 \pm 1.98$           | $25.76 \pm 2.52$                   |
| 1-9      | $53.41 \pm 2.2$                    | $54.72 \pm 2.49$           | <b><math>56.58 \pm 2.29</math></b> |
| <b>1</b> | <b><math>80.84 \pm 1.2</math></b>  | $72.79 \pm 1.6$            | $46.09 \pm 3.91$                   |
| 0,2-9    | $51.65 \pm 2.28$                   | $52.77 \pm 2.53$           | <b><math>54.59 \pm 2.23</math></b> |
| <b>2</b> | $51.31 \pm 3.53$                   | $36.59 \pm 3.33$           | $9.53 \pm 1.41$                    |
| 0-1,3-9  | <b><math>54.26 \pm 2.84</math></b> | $56.79 \pm 2.34$           | <b><math>58.87 \pm 2.18</math></b> |
| <b>3</b> | $52.88 \pm 2.6$                    | $32.64 \pm 1.91$           | $6.67 \pm 1.09$                    |
| 0-2,4-9  | <b><math>54.62 \pm 2.42</math></b> | $57.23 \pm 2.5$            | <b><math>58.75 \pm 2.42</math></b> |
| <b>4</b> | <b><math>56.99 \pm 1.87</math></b> | $40.06 \pm 2.88$           | $9.44 \pm 1.68$                    |
| 0-3,5-9  | $54.41 \pm 2.21$                   | $56.41 \pm 2.39$           | <b><math>58.18 \pm 2.02</math></b> |
| <b>5</b> | <b><math>64.11 \pm 2.27</math></b> | $51.86 \pm 2.21$           | $15.04 \pm 2.31$                   |
| 0-4,6-9  | $53.28 \pm 2.16$                   | $55.1 \pm 2.46$            | <b><math>57.54 \pm 2.49</math></b> |
| <b>6</b> | <b><math>73.54 \pm 2.36</math></b> | $65.8 \pm 4.25$            | $40.6 \pm 4.18$                    |
| 0-5,7-9  | $52.05 \pm 2.21$                   | $53.55 \pm 2.23$           | <b><math>56.06 \pm 2.33</math></b> |
| <b>7</b> | <b><math>68.22 \pm 1.17</math></b> | $61.15 \pm 1.99$           | $41.08 \pm 2.75$                   |
| 0-6,8-9  | $52.5 \pm 2.43$                    | $54.07 \pm 2.49$           | <b><math>56.01 \pm 2.76</math></b> |
| <b>8</b> | <b><math>77.39 \pm 1.24</math></b> | $68.53 \pm 2.34$           | $37.42 \pm 3.37$                   |
| 0-7,9    | $51.51 \pm 2.54$                   | $53.25 \pm 2.45$           | <b><math>55.28 \pm 2.37</math></b> |
| <b>9</b> | <b><math>72.82 \pm 1.48</math></b> | $63.08 \pm 1.9$            | $32.79 \pm 2.73$                   |
| 1-8      | $52.05 \pm 2.32$                   | $53.85 \pm 2.5$            | <b><math>56.06 \pm 2.52</math></b> |

### 643 D.3 Additional Results for MIA

644 Membership inference success for a single target model of our **Sample** and **Scale** methods is shown  
645 in Figure 8. In Figure 9, we present the results over for 5 different target models for **Sample**. The  
646 figure highlights that over all target models, the two privacy groups’ privacy risk is different: the  
647 group with higher protection  $\varepsilon = 10$  constantly has a lower AUC than the group with lower protection  
648  $\varepsilon = 20$ . The test statistics over the different privacy groups’ Lira likelihood scores for all five target  
649 models are shown in Table 10.

### 650 D.4 Comparison to Individualized Privacy with IPATE

651 We present the comparison between our IDP-SGD and IPATE [5] in Table 11. In PATE, accuracy  
652 refers to the student model accuracy. The results in Table 11 are averaged over three experiments  
653 for IPATE and ten runs for IDP-SGD. Note that the accuracies we report for IPATE differ from the  
654 accuracy values reported by [5] in Table 1, since they report average voting accuracy (*i.e.*, how correct  
655 are individual teacher model votes), whereas we report the resulting student model accuracies, which  
656 corresponds to the final performance of the method. Note that IPATE does not apply the performance  
657 improvements suggested by Papernot et al. [27] (*e.g.*, virtual adversarial training) or MixMatch which  
658 could increase the student model’s performance.

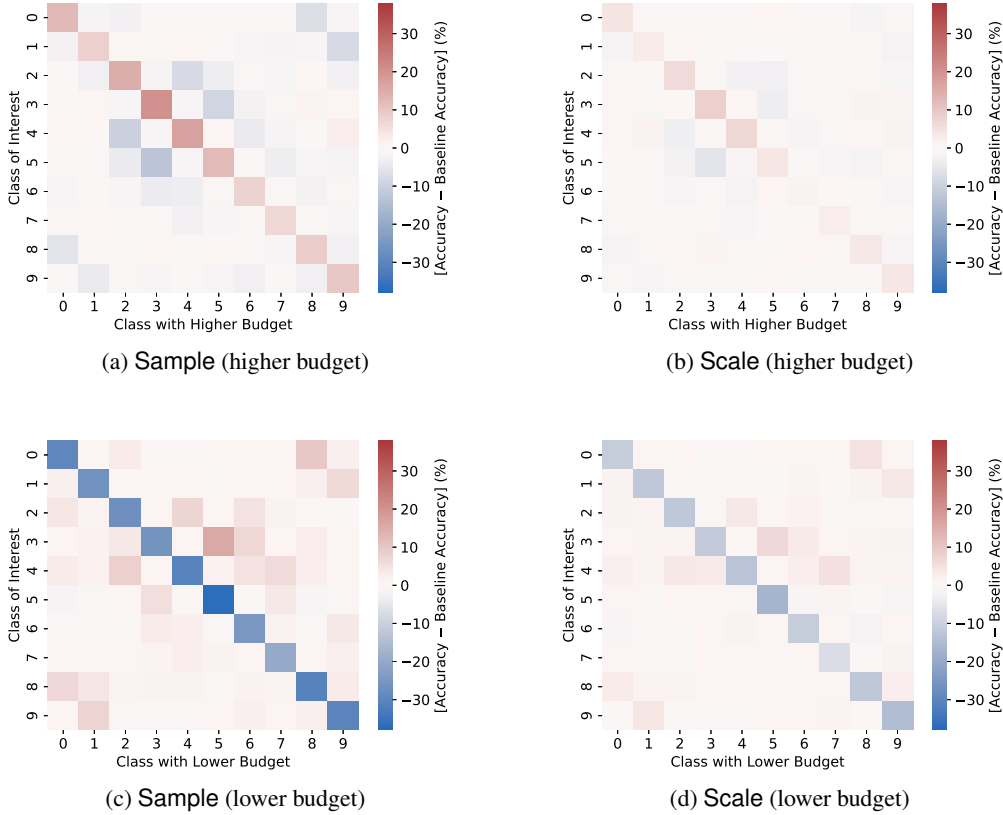

Figure 5: **CIFAR10: Accuracy Changes for Subgroups.** We assess how the test **Accuracy** of a **Class of interest** changes in comparison to the **Baseline Accuracy** (standard DP-SGD with  $\epsilon = 2$ ) when we, during training, assign a lower ( $\epsilon = 1$ ) or a higher ( $\epsilon = 3$ ) privacy budget to data points from a class (shown on the x-axis). The diagonals show that by increasing a class’ privacy budget (lower privacy), their utility increases, while it decreases with the decrease of privacy budget (higher privacy). Similar results for MNIST can be found in Figure 6.

## 659 D.5 Integrating Privacy Accounting and Assignment

660 The main goal behind individualized accounting is to obtain tighter privacy analysis (recall our  
 661 discussion in Section 2.2). Instead of tracking a single privacy loss estimate across all data points,  
 662 an individual privacy loss is kept track of for each data point. Feldman and Zrnic [9] defines a new  
 663 individual privacy filter, which drops data points that exceed the individualized privacy loss from  
 664 further processing. However, the same privacy budget is assigned to each data point. The individual  
 665 assignment of a privacy budget to each data point is a natural extension of individualized accounting  
 666 and can be directly incorporated into this framework. Therefore, a given data point has its own  
 667 privacy filter and is dropped from the analysis once the filter indicates that the data point’s privacy  
 668 budget is exhausted.

## 669 E Alternative Baselines

670 Throughout this work, we compare our methods with Standard DP-SGD which cannot take into  
 671 account different privacy requirements at the same time. Thus, we consider it to apply the highest  
 672 privacy protection required to all data points equally. Nonetheless, we can think of two more ways to  
 673 use Standard DP-SGD on data having heterogeneous privacy requirements. Those approaches have  
 674 different benefits and drawbacks and might perform better than our chosen baseline approach in some  
 675 scenarios.

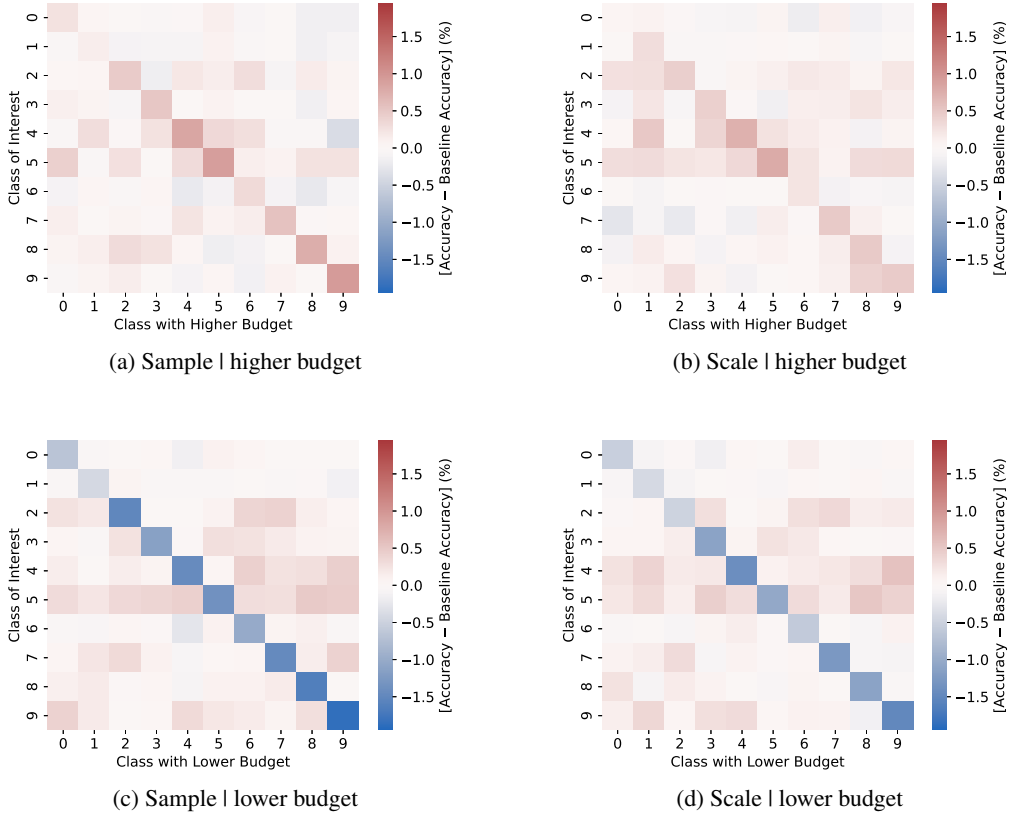

Figure 6: **MNIST: Accuracy Changes for Subgroups.** We assess how the test accuracy of a class changes (in comparison to standard DP-SGD with  $\epsilon = 2$ ) when we, during training, assign a lower ( $\epsilon = 1$ ) or a higher ( $\epsilon = 3$ ) privacy budget to data points from this class. The diagonals show that by increasing a class’ privacy budget (lower privacy), their utility increases, while it decreases with the decrease of privacy budget (higher privacy).

## 676 E.1 Exclude Lower Privacy Groups

677 Instead of applying the strongest privacy protection, the deciding ML expert could entirely exclude  
 678 data of low privacy groups from training for loosening the restrictions on the remaining data points’  
 679 influence on model updates. In some cases, it would be worth giving up the information and privacy  
 680 budgets of those lower privacy groups to achieve utility improvements. This approach performs poorly  
 681 if important information is wasted, *e.g.*, most data of one class has the highest privacy requirement.

## 682 E.2 Learn Privacy Groups Separately

683 It is also possible to make use of all privacy budgets, independent of their diversity, although only  
 684 using Standard DP-SGD. Namely, a model can be trained on each privacy group separately one after  
 685 another, whereby the corresponding lowest budget is regarded for each group. A drawback of this  
 686 approach is that the model could forget its knowledge about previously learned privacy groups.

## 687 E.3 Empirical Comparison of Baselines

688 We empirically evaluate against these two additional baselines using the MNIST dataset. For  
 689 baseline E.1, we include all data points with a privacy budget of  $\epsilon \geq 2$  und use  $\epsilon = 2$  as the privacy  
 690 budget for training. After hyperparameter tuning, the training on the remaining data points (43%+23%  
 691 and 37%+9% of the total data) yields the accuracy reported in Appendix E.3.

Table 9: **Per-class Individual Privacy Assignments.** We manually optimize the per-class individual privacy budgets for **Sample** such that the model achieves the same accuracy over all classes. The resulting per-class privacy budgets yield the maximum gap  $\Delta$  between the highest and lowest accuracy level of only 0.39% for **Sample**, and 0.88% for **Scale**. For the baseline ( $\varepsilon = 3$  for all classes)  $\Delta = 2.03$  is significantly higher, highlighting that our approach can successfully minimize the accuracy gap between different privacy groups. We run the experiment on the MNIST dataset and report average per-class test-accuracies over three separate runs. See each privacy group’s test accuracy over training in Figure 7.

| Class                          | 0     | 1     | 2     | 3     | 4     | 5     | 6     | 7     | 8     | 9     | $\Delta$ |
|--------------------------------|-------|-------|-------|-------|-------|-------|-------|-------|-------|-------|----------|
| Baseline ( $\varepsilon = 3$ ) | 98.95 | 99.06 | 98.39 | 98.09 | 97.93 | 98.47 | 98.16 | 98.12 | 97.78 | 97.03 | 2.03     |
| Budgets                        | 0.75  | 0.5   | 2.0   | 2.6   | 4.1   | 2.1   | 2.05  | 3.0   | 3.1   | 6.1   | /        |
| Sample                         | 98.16 | 98.09 | 98.16 | 97.95 | 98.10 | 97.91 | 97.77 | 97.99 | 98.02 | 97.89 | 0.39     |
| Scale                          | 98.44 | 98.36 | 98.13 | 98.02 | 97.76 | 98.17 | 97.91 | 97.96 | 97.91 | 97.56 | 0.88     |

Table 10: **Statistical differences between Privacy Groups.** We conduct a student t-test to determine if the Lira likelihood scores for data points with privacy budget  $\varepsilon = 10$  differ from the ones of data points with  $\varepsilon = 20$ . All results with  $p < 0.05$  indicate statistically significant differences. Results for **Sample**.

| Target Model | $\Delta$ | $p$      |
|--------------|----------|----------|
| 1            | 5.16     | 2.49e-07 |
| 2            | 2.41     | 0.016    |
| 3            | 1.84     | 0.066    |
| 4            | -4.03    | 5.52e-05 |
| 5            | 2.537    | 0.011    |

For baseline E.2, we also did hyperparameter tuning and used the best noise multiplier of 2.5 for training. We trained the groups sequentially, always continuing training with the next group once the privacy budget of the previous groups was exhausted. We evaluated both starting with the privacy group that has loosest and strongest preferences (orders [3,2,1] and [1,2,3], respectively). Starting with the group that has strongest privacy requirements and ending on the group that has loosest privacy requirements yielded the best results which we report in Appendix E.3.

In summary, we observe that our methods outperform the other baselines.

## F Alternative Individualization

We present the alternative ways of individualizing privacy guarantees in DP-SGD that we considered in the design process of IDP-SGD and describe their drawbacks.

### F.1 Individual Per-Data Point Noise

Individualized privacy could, in principle also be obtained by adding different amounts of noise to different data points. Every of the  $P$  privacy group would have their individual  $\{\sigma_1, \dots, \sigma_P\}$ . Utility improvements would result from some data points requiring smaller amounts of added noise. Note however, that in DP-SGD, while clipping is performed on a per-data point basis, noise addition is performed on a per-mini-batch basis (line 8 in Algorithm 3). Hence, there are two possibilities to implement individual noise addition: either (i) by operating on mini-batch sizes of 1, or (ii) by implementing a two-step sampling approach which first randomly samples a privacy group for a given training iteration and then applies the standard Poisson sampling to obtain the mini-batch consisting of data points from this group. While both approaches are conceptually correct, they exhibit significant drawbacks. Approach (i) first slows down training performance due to more operations requiring to be carried out on individual data points, rather than a mini-batch. Second, due to the weak signal-to-noise ratio when adding noise to individual gradients, model performance is likely to degrade. Finally, sampling cannot be performed with Poisson anymore since with Poisson sampling,

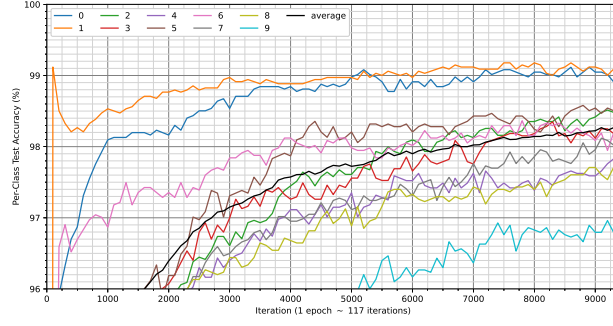

(a) Baseline

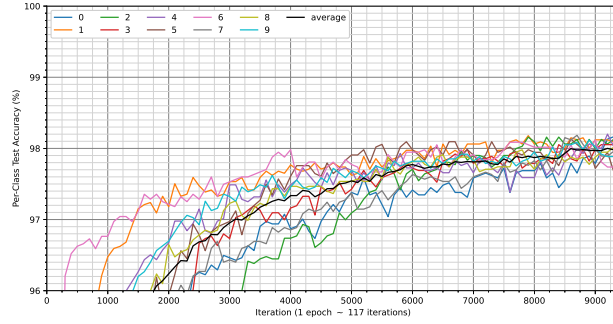

(b) Sample

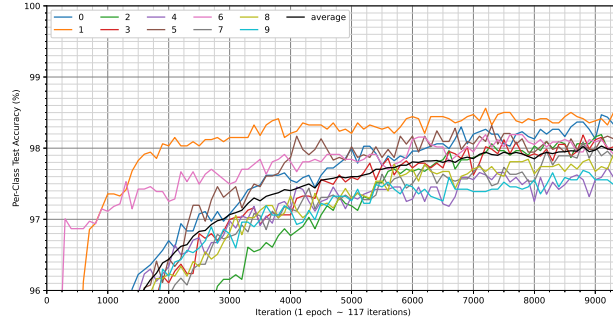

(c) Scale

Figure 7: **Per-class test accuracies over CIFAR10 training with Per-Class Privacy Budgets.** We manually tune the per-class privacy budgets for **Sample** to obtain the same per-class accuracy at the end of training, see Table 9. Comparison with the Baseline (a) where all classes obtain  $\epsilon = 3$  highlight that **Sample** (b) and **Scale** (c) successfully reduce the accuracy gap between the different classes.

716 it is not possible to pre-determine and specify exact mini-batch sizes, instead these depend on the  
717 outcome of the random sampling process. Approach (ii) could overcome the first two issues. However,  
718 the different groups sizes are still strictly smaller than the entire dataset and large parts of DP-SGD's  
719 degrading the tight privacy bounds obtained by privacy amplification through subsampling.<sup>6</sup> The  
720 privacy amplification through subsampling allows to scale down the noise  $\sigma$  by the factor  $B/N$  (with

<sup>6</sup>Note that there exist other, less popular approaches to implement DP in ML than the DP-SGD algorithm, such as Differentially Private Follow-the-Regularized-Leader (DP-FTRL) which do not rely on subsampling but instead obtain tighter privacy bounds from adding correlated noise over the training iterations. However, since DP-FTRL under-performs DP-SGD for high-privacy regimes, and unfolds its advantages mainly in FL scenarios

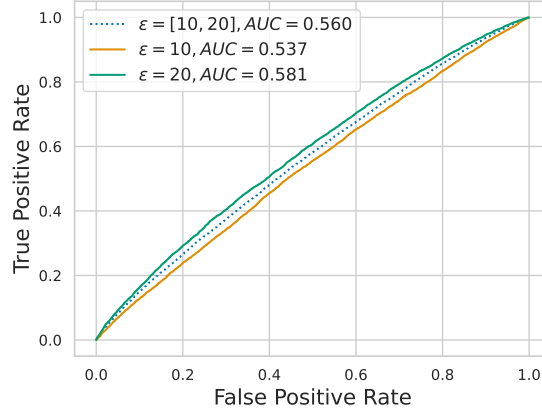

(a) Sample

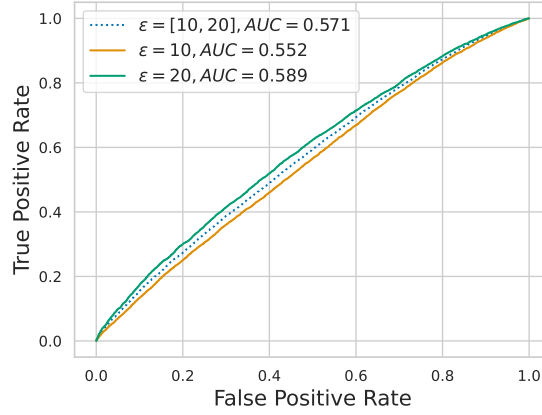

(b) Scale

Figure 8: **True-Positive rate vs. False-Positive Rate of Lira Membership Inference Attacks Per Privacy-Budget.** We follow the same setup as in Figure 2. We show the single target model for both (a) Sample and (b) Scale methods.

721  $B$  being the expected mini-batch size,  $N$  the total number of data points, and  $B \ll N$ ) while still  
 722 ensuring the same  $\epsilon$  as with  $\sigma$  [16]. This privacy amplification is crucial to the practical performance  
 723 (privacy-utility trade-offs) of DP-SGD. Hence, by using the  $P$  privacy groups of sizes  $\{N_1, \dots, N_P\}$   
 724 with  $N_i \ll N$ , the factors  $B/N_i \ll B/N$  for all  $i \in \{1, \dots, P\}$ . This effect cancels out, or in the worst  
 725 case even inverts the privacy-utility benefits that should arise from assigning individual data points  
 726 less noise based on their privacy preference in our individualization.

## 727 F.2 Duplicating Data Points

728 When duplicating data points in the training dataset, similar to the Upsampling mechanism in  
 729 IPATE [5], the DP-SGD algorithm itself does not need to be adapted. Instead, different privacy levels  
 730 of different data points stem from their individual number of replication within the training data. This  
 731 approach offers a very fine-grained control on individual privacy levels, since, in principle, each  
 732 data point could be replicated a different number of times. Utility gain would result from the larger  
 733 training dataset. However, this type of upsampling opens the possibility for the same data point to be  
 734 present multiple times in the mini-batch used for training in a given iteration. This stands in contrast

---

where the same data is only learned from once, or with a small number of epochs, we consider the approach outside of the scope of this work.

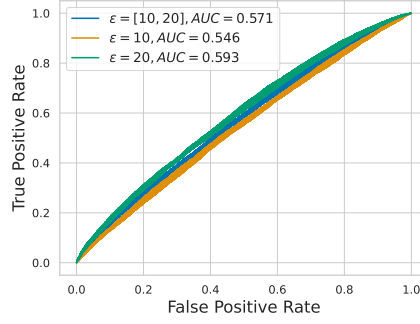

Figure 9: **True-Positive rate vs. False-Positive Rate of Lira Membership Inference Attacks Per Privacy-Budget.** We follow the same setup as in Figure 2. We run the experiment for five different target models and aggregate the results with the error bars for the Sample method.

Table 11: **Comparison between IDP-SGD and Individualized PATE (IPATE).** We select the weighting mechanism from IPATE that performs better than the upsampling method. The *Setup* indicates the size (in %) of privacy groups. We present the accuracy (%) for training with  $\epsilon = \{1.0, 2.0, 3.0\}$  privacy budgets, respectively to the order of the privacy groups.

| DATASET | SETUP       | BASELINE PATE    | IPATE            | SAMPLE       | SCALE        |
|---------|-------------|------------------|------------------|--------------|--------------|
| MNIST   | 34%-43%-23% | $91.17 \pm 1.25$ | $95.27 \pm 0.33$ | <b>97.81</b> | 97.78        |
|         | 54%-37%-9%  |                  | $95.74 \pm 0.43$ | <b>97.6</b>  | 97.54        |
| SVHN    | 34%-43%-23% | $22.46 \pm 5.19$ | $41.45 \pm 1.69$ | <b>84.56</b> | 84.48        |
|         | 54%-37%-9%  |                  | $44.64 \pm 0.55$ | <b>84.32</b> | 84.31        |
| CIFAR10 | 34%-43%-23% | $24.83 \pm 1.56$ | $33.20 \pm 0.94$ | 54.89        | <b>54.92</b> |
|         | 54%-37%-9%  |                  | $35.59 \pm 0.73$ | 54.88        | <b>55.00</b> |

Table 12: **Empirical evaluation against other baselines.** We report the obtained test accuracy obtained with our two methods vs. two other baselines for individualized privacy on the MNIST dataset. Similar to Table 7, we use  $\epsilon = 1, 2, 3$ . Both our Sample and Scale outperform the other baselines.

| Setup       | DP-SGD | E.1 Baseline | E.2 Baseline | Sample | Scale |
|-------------|--------|--------------|--------------|--------|-------|
| 34%-43%-23% | 96.75  | 97.6         | 97.4         | 97.81  | 97.78 |
| 54%-37%-9%  | 96.75  | 97.1         | 97.3         | 97.6   | 97.54 |

to the original DP-SGD, where participation of each data point for training at a given iteration is determined by an independent Bernoulli trial, and hence, a data point can be either included once or not at all in a mini-batch. The possibility for a data point to be included multiple times  $n$  inside the same mini-batch changes the sensitivity of the mechanism from  $c$  to  $nc$ . According to [20], when noise is added according to  $\sigma$ , a mechanism with sensitivity  $nc$  is  $(\alpha, \frac{2(nc)^2}{2\sigma^2})$ -RDP. The quadratic influence of the sensitivity to privacy bound results in a severe increase in the RDP  $\epsilon$ , making the approach suboptimal in terms of privacy-utility guarantees. Additionally, upsampling leads to an effective increase in a data point's the sample-rate which further increases privacy costs.

## G Additional Proofs

### G.1 Additional Proofs for Individualized Privacy

#### Proof for Theorem 3.1

*Proof.* First note that  $(\epsilon_1, \delta)$ -DP can be considered as a special case of  $(\{\epsilon_1, \epsilon_2, \dots, \epsilon_P\}, \delta)$ -DP, where  $\forall p \in [1, P] \epsilon_p = \epsilon_1$ . We can, hence apply Equation (3) and see that an  $M$  that satisfies  $(\epsilon_1, \delta)$ -

DP has a privacy guarantee of  $\mathbb{P}[M(D) \in R] \leq e^{\varepsilon_1} \cdot \mathbb{P}[M(D') \in R] + \delta$ . Given that by our definition  $\forall p \in [2, P]$  it holds that  $\varepsilon_p > \varepsilon_1$ , for all  $p$ , it holds that  $\mathbb{P}[M(D) \in R] \leq e^{\varepsilon_1} \cdot \mathbb{P}[M(D') \in R] \leq e^{\varepsilon_p} \cdot \mathbb{P}[M(D') \in R] + \delta$ . From this inequality, it follows that  $M$  also satisfies  $(\{\varepsilon_1, \varepsilon_2, \dots, \varepsilon_P\}, \delta)$ -DP.  $\square$

## Proof for Theorem 3.2

*Proof.* Analogous to the previous proof, by our definition, it holds that  $\forall p \in [1, P - 1]$  the  $\varepsilon_p < \varepsilon_P$ . From an  $M$  that satisfies  $(\{\varepsilon_1, \varepsilon_2, \dots, \varepsilon_P\}, \delta)$ -DP, it, therefore, holds that for all  $p$  the  $\mathbb{P}[M(D) \in R] \leq e^{\varepsilon_p} \cdot \mathbb{P}[M(D') \in R] + \delta \leq e^{\varepsilon_P} \cdot \mathbb{P}[M(D') \in R] + \delta$ . This inequality shows that  $M$  satisfies  $(\varepsilon_P, \delta)$ -DP.  $\square$

## G.2 Privacy Proofs for our Methods

Either of our methods can be considered as an SGM with the difference that it has different parameters from the point of view of each privacy group. This is because for each group, we have to examine neighboring datasets which differ in an arbitrary data point from that group. Our **Sample** method ensures an individual sample rate for all points of each group, while our **Scale** method applies an individual noise multiplier for all points of each group.

**Theorem G.1.** *Our Sample mechanism satisfies  $(\{\varepsilon_1, \varepsilon_2, \dots, \varepsilon_P\}, \delta)$ -DP.*

*Proof.* We prove the bound for any particular privacy group separately. Fix  $p \in \{1, \dots, P\}$ , let  $D \subseteq \mathcal{D}$  be the training dataset, and select any  $x_i \in D$  that belongs to group  $\mathcal{G}_p$ . We are interested in comparing outcomes of mechanism  $M$  on  $D$  with its outcomes on  $D' = D \setminus \{x_i\}$  where  $M$  represents a particular model update of **Sample**. We get Gaussian mixtures

$$\begin{aligned} M(D') &= \sum_{L \subset D} \pi_L \mathcal{N}\left(f(L), \sigma_{\text{sample}}^2 \mathbf{I}^d\right) & \text{and} \\ M(D) &= \sum_{L \subset D} \pi_L \left( (1 - q_p) \mathcal{N}\left(f(L), \sigma_{\text{sample}}^2 \mathbf{I}^d\right) + q_p \mathcal{N}\left(f(L \cup \{x_i\}), \sigma_{\text{sample}}^2 \mathbf{I}^d\right) \right), \end{aligned}$$

where  $f(L)$  is the clipped gradient of the current mini-batch  $L$ ,  $\pi_L$  is its probability,  $\sigma_{\text{sample}} > 0$  is the noise scale,  $\mathbf{I}^d$  is the identity matrix, and  $0 < q_p \leq 1$  is the individual sample rate of  $x_i$  and every other point in  $\mathcal{G}_p$ . Note that  $\sigma_{\text{sample}}$  is actually multiplied by the clip norm  $c_{\text{sample}} > 0$ . Gaussian mechanisms are invariant regarding scaling of their sensitivity and noise scale, but instead depend on the relationship between sensitivity and noise scale, called the noise multiplier. Hence, we can ignore  $c_{\text{sample}}$  and consider  $f$  to have sensitivity 1.

Now we can see that the Gaussian mixtures of our **Sample** are equivalent to those corresponding to the original SGM from Mironov et al. [21], Thm. 4, when we parameterize it with sample rate  $q_p$  and noise scale  $\sigma_{\text{sample}}$  which are individual per group. Therefore, all RDP bounds of the original SGD apply, especially  $(\alpha, \bar{\varepsilon}_p)$ -RDP with  $\bar{\varepsilon}_p = 2q_p^2 \frac{\alpha}{\sigma_{\text{sample}}^2}$  in a particular parameter regime (cf. Thm. 11 from Mironov et al. [21]). As a final step of the proof, we need to convert from  $(\alpha, \bar{\varepsilon}_p)$ -RDP guarantees to  $(\varepsilon_p, \delta)$ -DP guarantees following Mironov [20] (see Section 2.1). Note that our individual parameters have been selected before the start of training so that each group's privacy budget is exhausted at the intended number of iterations (see Algorithm 1).  $\square$

**Theorem G.2.** *Our Scale mechanism satisfies  $(\{\varepsilon_1, \varepsilon_2, \dots, \varepsilon_P\}, \delta)$ -DP.*

*Proof.* This proof is analog to the proof of Theorem G.1 with the difference that we have a global sample rate  $q$  but individual noise multipliers  $\sigma_p$  and clip norms  $c_p$ . Moreover, Algorithm 2 is used to configure parameters prior to training.  $\square$
